# Deep convolutional models improve predictions of macaque V1 responses to natural images

Santiago A. Cadena<sup>1,3,6,@</sup>, George H. Denfield<sup>4,6</sup>, Edgar Y. Walker<sup>4,6</sup>, Leon A. Gatys<sup>1,3</sup>,  
Andreas S. Tolias<sup>3,4,5,6,\*</sup>, Matthias Bethge<sup>1,2,3,6,\*</sup>, and Alexander S. Ecker<sup>1,3,6,\*</sup>

<sup>1</sup>Centre for Integrative Neuroscience and Institute for Theoretical Physics, University of Tübingen, Germany

<sup>2</sup>Max Planck Institute for Biological Cybernetics, Tübingen, Germany

<sup>3</sup>Bernstein Center for Computational Neuroscience, Tübingen, Germany

<sup>4</sup>Department of Neuroscience, Baylor College of Medicine, Houston, TX, USA

<sup>5</sup>Department of Electrical and Computer Engineering, Rice University, Houston, TX, USA

<sup>6</sup>Center for Neuroscience and Artificial Intelligence, BCM, Houston, TX, USA

\*These authors contributed equally

@Corresponding author: [santiago.cadena@bethgelab.org](mailto:santiago.cadena@bethgelab.org)

## Abstract

Despite great efforts over several decades, our best models of primary visual cortex (V1) still predict neural responses quite poorly when probed with natural stimuli, highlighting our limited understanding of the nonlinear computations in V1. At the same time, recent advances in machine learning have shown that deep neural networks can learn highly nonlinear functions for visual information processing. Two approaches based on deep learning have recently been successfully applied to neural data: transfer learning for predicting neural activity in higher areas of the primate ventral stream and data-driven models to predict retina and V1 neural activity of mice. However, so far there exists no comparison between the two approaches and neither of them has been used to model the early primate visual system. Here, we test the ability of both approaches to predict neural responses to natural images in V1 of awake monkeys. We found that both deep learning approaches outperformed classical linear-nonlinear and wavelet-based feature representations building on existing V1 encoding theories. On our dataset, transfer learning and data-driven models performed similarly, while the data-driven model employed a much simpler architecture. Thus, multi-layer CNNs set the new state of the art for predicting neural responses to natural images in primate V1. Having such good predictive *in-silico* models opens the door for quantitative studies of yet unknown nonlinear computations in V1 without being limited by the available experimental time.

# 1 Introduction

An essential step towards understanding visual processing in the brain is building models that accurately predict neural responses to arbitrary stimuli (Carandini et al., 2005). Primary visual cortex (V1) has been a strong focus of sensory neuroscience ever since Hubel and Wiesel’s seminal studies demonstrated that neurons in V1 respond selectively to distinct image features like local orientation and contrast (Hubel and Wiesel, 1959, 1968). Our current standard model of V1 is based on linear-nonlinear models (LN) (Jones and Palmer, 1987; Heeger, 1992) and energy models (Adelson and Bergen, 1985) to explain simple and complex cells, respectively. While these simple models explain responses to simple stimuli such as gratings reasonably well, they fail to account for neural responses to natural stimuli (Olshausen and Field, 2005; Talebi and Baker, 2012).

Simple LN models fail because natural stimuli unlock nonlinear subunits that cannot be captured by a linear transformation of the stimulus. To address this issue, LN-LN cascade models have been proposed, which either learn (convolutional) subunits (Rust et al., 2005; Touryan et al., 2005; Vintch et al., 2015) or use handcrafted wavelet representations (Willmore et al., 2008). These cascade models outperform simple LN models, but they currently do not capture the full range of nonlinearities observed in V1, such as gain control mechanisms and potentially other not-yet-understood nonlinear response properties. Because experimental time is limited, LN-LN models have to be designed carefully to keep the number of parameters tractable, limiting their expressiveness to energy models for direction-selective and complex cells.

Recent advances in machine learning and computer vision using deep neural networks (‘deep learning’) have opened a new door to learn much more complex non-linear models of neural responses. We identify two main approaches that we refer to as goal-driven, and data-driven.

The goal-driven approach is based on transfer learning (Donahue et al., 2014), a paradigm that has been very successful in deep learning. Convolutional neural networks (CNNs) have reached human-level performance on visual tasks like object classification by training on more than one million images (Krizhevsky et al., 2012; Simonyan and Zisserman, 2014; He et al., 2016; Huang et al., 2016). These CNNs optimized for visual tasks have proven extremely useful as nonlinear feature spaces for tasks where less labeled data is available (e.g. Kümmerer et al. 2014). This transfer to a new task is achieved by (linearly) reading out the network’s internal representations of the input. Yamins, DiCarlo and colleagues showed that using deep networks trained on large-scale object recognition as nonlinear feature spaces for neural system identification works remarkably well in higher areas of the ventral stream, such as V4 and IT (Yamins et al., 2014).

The deep data-driven approach is based on fitting all model parameters directly to neural data (Antolik et al., 2016; Batty et al., 2016; McIntosh et al., 2016; Klindt et al., 2017). The critical advance of deep models in neural system identification is that they can have many more parameters than classical LN cascade models discussed above, because they exploit computational similarities between different neurons. While previous approaches treated each neuron as an individual multivariate regression problem, modern CNN-based approaches learn one model for an entire population of neurons, thereby exploiting two key properties of local neural circuits: (1) they share the same presynaptic circuitry (for V1: retina and LGN) and (2) many neurons perform essentially the same computation, but at different locations (topographic organization, implemented by convolutional weight sharing).

While both, goal-driven and data-driven approaches have been shown to outperform LN models, it is currently unknown how their performance compares. Moreover, neither approach has been evaluated

44 in monkey V1 (see Kindel et al. 2017 for concurrent work). Here, we address this, and show that both  
45 methods perform similarly well outperforming classic LN cascade models by a substantial margin, offering  
46 an alternative to study unknown V1 nonlinear properties.

## 47 2 Materials and Methods

### 48 2.1 Electrophysiological recordings

49 We performed non-chronic recordings from two adult male rhesus monkeys (aged 8 and 11; weighing 10.9kg  
50 and 12.1kg) with a 32-channel linear silicon probe (NeuroNexus V1x32-Edge-10mm-60-177). The surgical  
51 methods and recording protocol were described previously (Denfield et al., 2017). Briefly, form-specific  
52 titanium recording chambers and headposts were implanted under full anesthesia and aseptic conditions.  
53 The bone was originally left intact, and only prior to recordings small trephinations (2 mm) were made over  
54 medial primary visual cortex at eccentricities ranging from 1.4 to 3.0 degrees of visual angle. Recordings  
55 were done within two weeks of each trephination. Probes were lowered using a Narishige Microdrive  
56 (MO-97) and a guide tube to penetrate the dura. Care was taken lower the probe slowly, not to penetrate  
57 the cortex with the guide tube and to minimize tissue compression (for a detailed description of the  
58 procedure, see Denfield et al. 2017). All experimental procedures complied with guidelines of the NIH and  
59 were approved by the Baylor College of Medicine Institutional Animal Care and Use Committee (permit  
60 number: AN-4367).

### 61 2.2 Data acquisition and spike sorting

62 Electrophysiological data were collected continuously as broadband signal (0.5–16,000 Hz) digitized at 24  
63 bits as described previously (Ecker et al., 2010). Our spike sorting methods are based on (Ecker et al. 2014,  
64 code available at <https://github.com/aecker/moksm>), but with adaptations to the novel type of silicon  
65 probe as described previously (Denfield et al., 2017). Briefly, we split the linear array of 32 channels into  
66 14 groups of 6 adjacent channels (with a stride of two), which we treated as virtual electrodes for spike  
67 detection and sorting. Spikes were detected when channel signals crossed a threshold of five times the  
68 standard deviation of the noise. After spike alignment, we extracted the first three principal components  
69 of each channel, resulting in an 18-dimensional feature space used for spike sorting. We fitted a Kalman  
70 filter mixture model (Calabrese and Paninski, 2011; Shan et al., 2017) to track waveform drift typical for  
71 non-chronic recordings. The shape of each cluster was modeled with a multivariate t-distribution ( $df = 5$ )  
72 with a ridge regularized covariance matrix. The number of clusters was determined based on a penalized  
73 average likelihood with a constant cost per additional cluster (Ecker et al., 2014). Subsequently, we used a  
74 custom graphical user interface to manually verify single-unit isolation by assessing the stability of the  
75 units (based on drifts and health of the cells throughout the session), identifying a refractory period, and  
76 inspecting the scatter plots of the pairs of channel principal components.

### 77 2.3 Visual stimulation and eye tracking

78 Visual stimuli were rendered by a dedicated graphics workstation and displayed on a CRT monitor with a  
79 100 Hz refresh rate. The monitors were gamma corrected to have a linear luminance response profile. A  
80 camera-based, custom-built eye tracking system verified that monkeys maintained fixation within  $\sim 0.42$   
81 degrees around the target. Offline analysis showed that monkeys typically fixated much more accurately.

82 The monkeys were trained to fixate on a red target of  $\sim 0.15$  degrees in the middle of the screen. After  
83 they maintained fixation for 300 ms, a visual stimulus appeared. If the monkeys fixated throughout the  
84 entire stimulus period, they received a drop of juice at the end of the trial.

## 85 2.4 Receptive field mapping

86 At the beginning of each session, we first mapped receptive fields. We used a sparse random dot stimulus  
87 for receptive field mapping. A single dot of size 0.12 degrees of visual field was presented on a uniform  
88 gray background, changing location and color (black or white) randomly every 30 ms. Each trial lasted 2  
89 seconds. We obtained multi-unit receptive field profiles for every channel using reverse correlation. We  
90 then estimated the population receptive field location by fitting a 2D Gaussian to the spike-triggered  
91 average across channels at the time lag that maximizes the signal-to-noise-ratio. We subsequently placed  
92 our natural image stimulus at this location.

## 93 2.5 Natural image stimulus

94 We used an approach similar to Freeman et al. 2013. We generated stimuli with different degrees of  
95 “naturalness” by capturing different levels of higher order correlations from a local to a global scale. This  
96 was achieved by using a parametric model for texture synthesis proposed by Gatys et al. 2015 that uses  
97 the pre-trained feature maps of VGG-19 (Simonyan and Zisserman, 2014). Briefly, the algorithm consists  
98 of analysis and synthesis stages. During analysis, the summary statistics —given by the correlation matrix  
99 between feature maps (also, Gram matrix)— are computed for each layer in the net. During synthesis, by  
100 starting with a random white noise image, pixels are pushed (usually via gradient descend) in a direction  
101 that leads to Gram matrices matching those of the original image.

102 For visual stimuli, we randomly selected and gray-scaled 1450 images from ImageNet (Russakovsky et  
103 al., 2015). Additionally, for every image, we synthesized four new types of images using the parametric  
104 texture model (Gatys et al., 2015). For displaying and further analyses, we cropped the central 140 pixels  
105 of each image. For texture synthesis, we matched all the Gram matrices cumulatively up to conv1, conv2  
106 and conv3 and conv4. (e.g. the conv3 model matches Gram matrices for layers conv1\_1, conv2\_1 and  
107 conv3\_1 of VGG-19). Figure 1A shows three example images with their respective texturized versions.

108 The entire data set contains  $1450 \times 5 = 7250$  images (original plus synthesized). During each trial, 29  
109 images were displayed, each for 60 ms, with no blanks in between (Figure 1 B). Each image was masked  
110 by a circular mask with a diameter of 2 degrees and a soft fade-out starting at a diameter of 1 degree:

$$m(r) = \begin{cases} 1 & \text{if } r < 1 \\ 0.5 \cos(\pi(r - 1)) + 0.5 & \text{otherwise} \end{cases}$$

111 Images were randomized such that consecutive images were not of the same type or synthesized from  
112 the same image. A full pass through the dataset took 250 successful trials, after which it was traversed  
113 again in a new random order. Images were repeated between one and four times, depending on how many  
114 trials the monkeys completed in each session.

## 115 2.6 GLM with pre-trained CNN features

116 Our proposed model consists of two parts: feature extraction and a generalized linear model (GLM; Fig.  
117 3). The features are the output maps of intermediate convolutional layers of VGG-19 (Simonyan and

118 Zisserman, 2014) to a stimulus image. We fit a separate GLM for each convolutional layer of VGG-19.  
 119 We used a normalized version of VGG-19, where the weights have been rescaled such that the average  
 120 activation of each feature map over a large set of natural images is equal to one (Gatys et al., 2016). The  
 121 original 140 px images were first cropped to omit the 30 px border and then downsampled by a factor of  
 122 two, resulting in images of size 40 px. The output of the convolutional layers is a set of  $K$  feature maps  
 123 (denoted as depth in Fig. 3).

124 The GLM consists of linear fully connected weights  $w_{ijk}$  for each neuron that compute a dot product  
 125 with the input feature maps  $\psi_{ijk}(x)$ , an exponential nonlinearity, and Poisson noise. Here,  $i$  and  $j$  index  
 126 space, while  $k$  indexes feature maps. The weights have the same dimensionality as the feature maps. The  
 127 spiking rate of a given neuron  $r$  will follow:

$$\log r(x) = \sum q_{ijk} w_{ijk} + b \quad (1)$$

128 Additionally, three regularization terms were applied to the weights:

129 1. **Sparsity:** Most weights need to be zero since we expect the spatial pooling to be localized. We use  
 130 the L1 norm of the weights:

$$\mathcal{L}_{sparse} = \lambda_{sparse} \sum |w_{ijk}| \quad (2)$$

131 2. **Spatial Smoothness:** Together with sparseness, spatial smoothness encourages spatial locality by  
 132 imposing continual regular changes in space. We computed this by an L2 penalty on the Laplacian  
 133 of the weights:

$$\mathcal{L}_{laplace} = \lambda_{laplace} \sqrt{\sum (w_{:, :, k} * L)_{ij}^2}, \quad L = \begin{bmatrix} 0 & -1 & 0 \\ -1 & 4 & -1 \\ 0 & -1 & 0 \end{bmatrix} \quad (3)$$

134 3. **Group Sparsity:** Encourages our model to pool from a reduced set of feature maps to explain each  
 135 neuron's responses:

$$\mathcal{L}_{group} = \lambda_{group} \sum_k \sqrt{w_{ijk}^2} \quad (4)$$

136 Considering the recorded image-response as  $(x, y)$  for one neuron, the resulting loss function is given  
 137 by:

$$\mathcal{L} = - \sum y \log r(x) + r(x) + \mathcal{L}_{sparse} + \mathcal{L}_{laplace} + \mathcal{L}_{group} \quad (5)$$

138 We fit the model by minimizing the loss using the Adam optimizer (Kingma and Ba, 2014) on a training  
 139 set consisting of 80% of the data, and reported performance on the remaining 20%. We cross-validated  
 140 the parameters  $\lambda_{sparse}$ ,  $\lambda_{lap}$ ,  $\lambda_{group}$  for each neuron independently by performing a grid search over four  
 141 logarithmically spaced values for each parameter. The validation was done on 20% of the training data.  
 142 The same split of data for training, validation, and testing was used to fit all models in this study.

## 2.7 Convolutional neural network model

We followed the results of Klindt et al. 2017 and use their best-performing architecture that obtained state-of-the-art performance on a public dataset (Antolik et al., 2016). As our VGG-based model, this model also consisted of convolutional feature extraction followed by a GLM, the difference being that here the convolutional feature space was learned from neural data instead of having been trained on object recognition. The feature extraction architecture consisted of three convolutional layers with filters of receptive field size  $13 \times 13$  px for the first layer and  $3 \times 3$  px for the subsequent layers. Each layer had 32 feature maps (Fig. 5). As in the original publication (Klindt et al., 2017) we regularized the convolutional filters by imposing smoothness constraints on the first layer and group sparseness on the second and third. A notable difference to our VGG-based GLM is that here the readout weights are factorized in space and feature maps:

$$w_{ijk} = u_{ij}v_k$$

where  $u_{ij}$  is a spatial mask and  $v_k$  a set of feature pooling weights. We used an exponential linear unit (ELU; Clevert et al. 2015) as the output nonlinearity.

## 2.8 Other baseline models

The performance of the two convolutional models was compared with two alternative models: a regularized linear nonlinear Poisson model (LNP; Simoncelli et al. 2004) and the Berkeley wavelet transform (BWT) linearized model (Willmore et al., 2008). Images were down-sampled to 40 px as in our proposed model.

The LNP model was fitted using two regularization terms: smoothness and sparseness. Their corresponding parameters were cross-validated independently for each cell as above.

The BWT model (Willmore et al., 2008, 2010) uses a set of scaled, oriented, frequency- and phase-shifted wavelets to decompose the original image. We used the publicly available implementation from StrfLab (Willmore et al., 2008) and we set the temporal size and temporal velocities to one. We picked the following parameters for the Gabor wavelet bank that lead to best performance on test set in order for it to be competitive with the other methods: 16 evenly spaced orientations, 5 frequency divisions between 0.5 and 6 cycles per degree, 0.5 ratio between the Gaussian window and spatial frequency, 2.5 standard deviation of the Gaussian window of spatial separation of each wavelet. A log link and Poisson noise were used to fit the regression weights on top of the feature space.

## 2.9 Performance evaluation

We measured the performance of all models with the fraction of explainable variance explained  $FEV$ . That is, the ratio between the variance accounted for by the model (variance explained) and the explainable variance. The explainable variance is lower than the total variance, because observation noise prevents even a perfect model from accounting for all variance. We estimated the amount of observation noise by averaging the variance across images of responses to the same stimulus:  $E_j[Var_i[y_i|x_j]]$ . If our model predicted an average response of  $\hat{y}$ , then  $FEV$  is computed as in equation 6 for the observed spike counts  $y$ .

$$FEV = 1 - \frac{Var[\hat{y} - y] - E_i[Var_j[y]]}{Var[y] - E_i[Var_j[y]]} \quad (6)$$

### 3 Results

We measured the spiking activity of populations of neurons in V1 of two awake, fixating rhesus macaques using a 32-channel linear array spanning all cortical layers (Fig. 2A). We isolated 307 neurons in 23 sessions. Our stimuli consisted of synthesized images that capture different levels of high order correlations present in natural images (see Methods). Each stimulus was shown for 60ms, with no in-between blanks, and was centered on the mapped population receptive field of the neurons. The images were scaled to have the same contrast.

The entire set of stimuli has 7250 unique images and was shown one to four times for each session. We used only sessions with two or more repetitions, and applied a selection criterion to the neurons based on how much of their variability was induced by the stimulus. We estimated the observation noise by averaging the variance of responses to repeated presentations of the images. By subtracting the average trial-to-trial variance to repeated presentations from the total variance of the responses for every neuron, we obtain an estimate of the explainable variance. We discarded neurons with a ratio of explainable-to-total variance smaller than 0.15, yielding 166 isolated neurons recorded in 17 sessions. 51 neurons belonged to sessions with two repetitions and 115 to those with four.

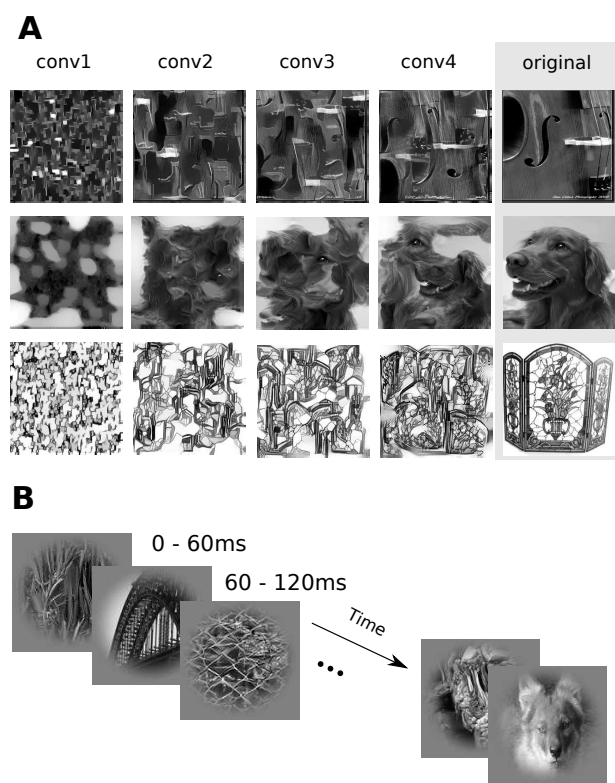

**Figure 1. Stimulus paradigm** **A.** Classes of images shown in the experiment. We used grayscale natural images (labeled ‘original’) from the ImageNet dataset (Russakovsky et al., 2015) along with textures synthesized from these images using the texture synthesis algorithm described by Gatys et al. 2015. Each row shows four synthesized versions of three example original images using different convolutional layers (see Materials and Methods for details). Lower convolutional layers capture more local statistics compared to higher ones. **B.** Stimulus sequence. In each trial, we showed a randomized sequence of images (each displayed for 60 ms covering 2 degrees of visual angle) centered on the receptive fields of the recorded neurons while the monkey sustained fixation on a target. The images were masked with a circular mask with cosine fadeout.

#### 3.1 Generalized linear model with pre-trained CNN features

We used the network VGG-19 (Simonyan and Zisserman, 2014) to extract a nonlinear feature space for a generalized linear model (GLM). VGG-19 is a CNN trained on the large image classification task ImageNet (ILSVRC2012) that takes an RGB image as input and infers the class of the dominant object in the image (among 1000 possible classes). Its architecture consists of a hierarchy of linear-nonlinear transformations

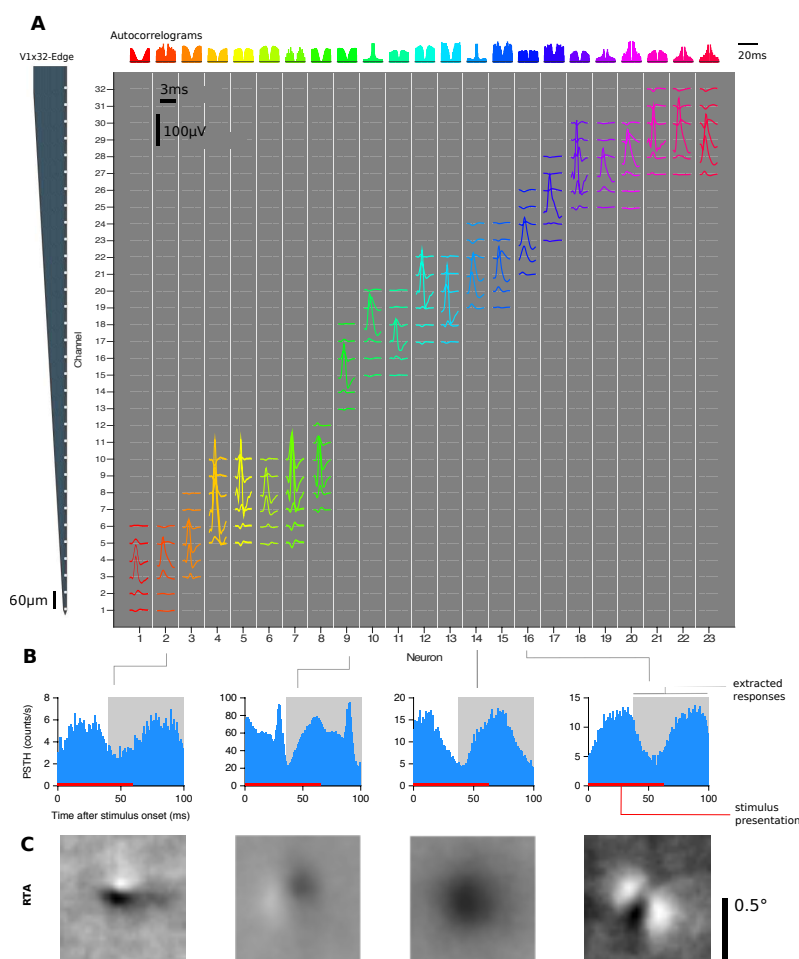

**Figure 2. V1 electrophysiological responses.** **A.** Isolated single-unit activity. We performed acute recordings with a 32-channel, linear array (NeuroNexus V1x32-Edge-10mm-60-177, layout shown in the left) to record in primary visual cortex of two awake, fixating macaques. The channel mean-waveform footprints of the spiking activity of 23 well-isolated neurons in one example session are shown in the central larger panel. The upper panel shows color-matched autocorrelograms. **B.** Peri-stimulus time histograms (PSTH) of four example neurons from **A**. Spike counts were binned with  $t = 1$  ms, aligned to the onset of each stimulus image, and averaged over trials. The 60 ms interval where the image was displayed is shown in red. We ignored the temporal profile of the response and extracted spike counts for each image on the 40–100 ms interval after image onset (shown in light gray). **C.** The Response Triggered Average (RTA) calculated by reverse correlation of the extracted responses.

199 (layers) where the input is spatially convolved with a set of filters and then passed through a rectifying  
 200 nonlinearity (Fig. 3). The output of such layers produces a number of feature maps that serve as input for  
 201 the next layer. Additionally, the network has pooling layers where the feature maps are down-sampled by  
 202 taking the local maximum values of neighboring pixels. There are 16 convolutional layers that can be  
 203 grouped into five groups with 2, 2, 4, 4, 4 convolutional layers and 64, 128, 256, 512, 512 output feature  
 204 maps, respectively, and a pooling layer in between each group.

205 For each convolutional layer of VGG-19, we fit a GLM that uses this layer’s representation of the  
 206 stimulus as a nonlinear feature space. To do so, we fed all images in our stimulus set through the network  
 207 and extracted the feature maps of every convolutional layer (Fig. 3). We then learned a set of linear weights  
 208 followed by an exponential nonlinearity to predict each neuron’s response (Fig. 3). Since the convolutional  
 209 feature spaces are larger than the number of pixels in the image, regularization of the readout weights  
 210 is particularly important. We used three regularization terms for the weights. (1) Sparseness, because  
 211 receptive fields are localized, we expect most weights to be zero; (2) smoothness, to encourage a regular  
 212 spatial continuity of the receptive fields; and (3) group sparsity, which encourages the model to pool  
 213 only from a small number of feature maps. We fit this model for each convolutional layer of VGG-19 to  
 214 maximize the likelihood of the predicted response under a Poisson noise model and cross-validated over  
 215 the three regularization terms for each cell independently.

216 To measure our model’s performance and compare it to others, we computed the fraction of explain-



217 able variance explained ( $FEV$ ). This metric, which ranges from 0 to 1, measures what fraction of the  
 218 stimulus-driven response is explained by the model, ignoring the unexplainable trial-to-trial variability in  
 219 the neurons' responses (for details see Methods).  
 220

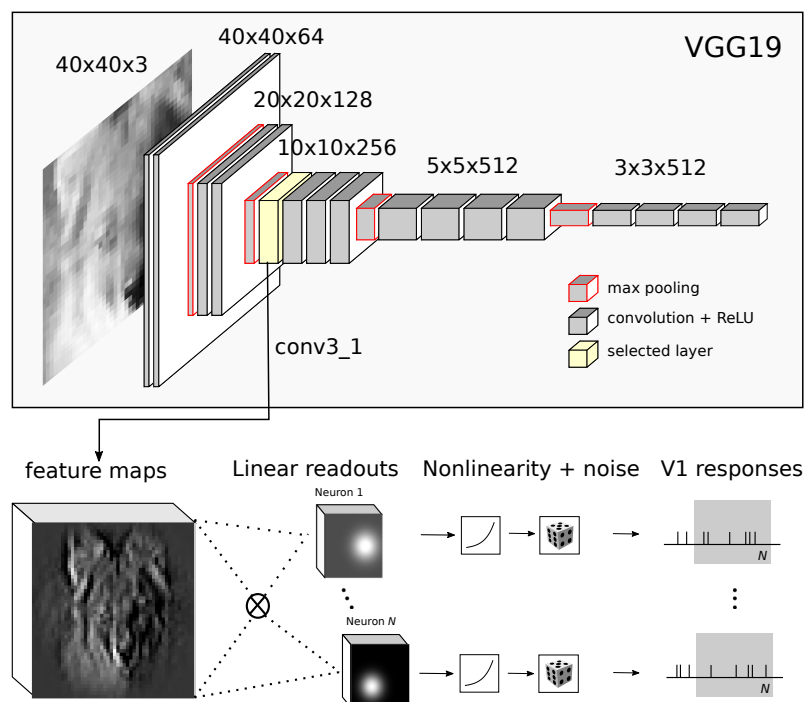

**Figure 3. Our proposed model** For each of the 16 convolutional layers of VGG-19 (Simonyan and Zisserman, 2014), we extract the output feature maps of the images shown to the monkey. We then train for each neuron a Generalized Linear Model with Poisson noise and log link on top of this representation to predict the observed spike counts from monkey V1. The linear readouts have the same size as the feature maps and their resulting dot product is fed to the exponential nonlinearity. The learning objective was Maximum Likelihood with three regularization terms on the weights for sparseness, spatial smoothness, and group sparseness (see Methods). This facilitated identifying a reduced set of feature maps to pool from, as well as the location of each neuron's receptive field.

### 221 3.2 Intermediate layers of VGG best predict V1 responses

222 The model based on the fifth (out of sixteen) layers' features (called 'conv3\_1', Fig. 3) best predicted  
 223 neuronal responses to novel images not seen during training (Fig. 4). This model predicted on average  
 224 50.1% of the explainable variance. In contrast, performance for the very first layer was poor (31%  $FEV$ ),  
 225 but increased monotonically up to conv3\_1. Afterwards, the performance again decreased continually up  
 226 the hierarchy (Fig. 4). These results followed our intuition that early to intermediate processing stages in  
 227 a hierarchical model should match primary visual cortex, given that V1 is the third processing stage in  
 228 the visual hierarchy after the retina and LGN.

229 One potential concern is that the performance curve may be related more to receptive field size  
 230 of the units –the size of the input region which a unit depends on– than to actual nonlinear response  
 231 properties. Each VGG layer convolves its inputs with a  $3 \times 3$  px kernel, leading to growing receptive  
 232 field sizes along the hierarchy. For example, the receptive field size of units in the first layer ('conv1\_1')

233 is  $3 \times 3$  px (which covers only 0.08 degrees of visual angle). Because nonlinear features are extracted  
234 at the scale of the units' receptive field, it may be important to match receptive field sizes between  
235 each VGG layer and V1. To address this concern, we resized the input image for each layer model  
236 such that the receptive field size of units in the layer that provided the feature space roughly matched  
237 2 degrees of visual angle (the field of view that V1 neurons were stimulated with). In this way, the  
238 image patch each VGG unit saw was equivalent across layers. This procedure was done for the first nine  
239 convolutional layers as performance was already steadily decreasing. The resulting performance across  
240 layers agreed with the previous results (conv3\_1 was still the best performing layer; Fig 4, dashed gray line).  
241

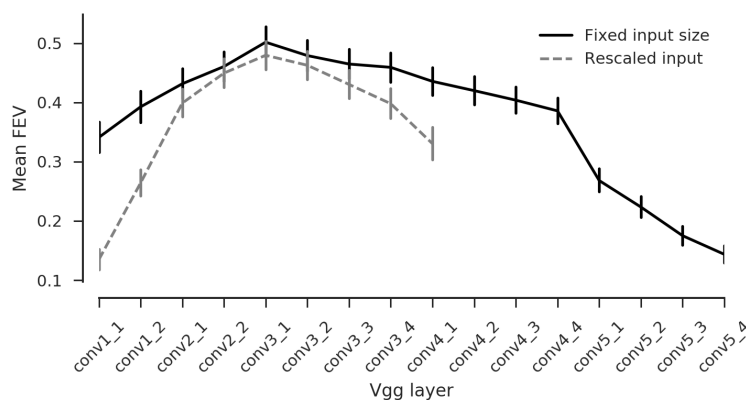

**Figure 4. Model performance on test set** Average fraction of explainable variance explained (*FEV*) on test set. Conv3\_1 shows on average the highest predictive performance for both models trained with a fixed input size for all layers, and rescaled inputs to match units' receptive field sizes across layers.

### 242 3.3 Data-driven CNN model and GLM with pre-trained CNN set state of 243 the art

244 We next asked how the predictive performance of our VGG-based model compared to other quantitative  
245 models of monkey V1. We therefore compared it to a classical linear-nonlinear Poisson (LNP) model, a  
246 wavelet-based model and a multi-layer CNN fit directly to the data.

247 We regularized the LNP model by selecting for smoothness and sparseness of the linear filters via  
248 cross-validation (see Methods). The wavelet-based model uses the Berkeley Wavelet Transform (BWT,  
249 Willmore et al. 2008, 2010), a handcrafted nonlinear feature space based on orthogonal wavelets that  
250 resemble Gabor functions. This model is the current state of the art in the neural prediction challenge  
251 for monkey V1 responses to natural images (<http://neuralprediction.berkeley.edu>). Because recent  
252 work has shown that multi-layer convolutional neural networks can be fit directly to neural data on natural  
253 image datasets (Antolik et al., 2016; Kindel et al., 2017; Klindt et al., 2017), we also fit a three-layer CNN  
254 identical to that of Klindt et al. 2017. This model is illustrated in Fig. 5. For more details on the models,  
255 see Methods.

256  
257 We compared the models for a number of cells from a representative recording (Fig. 6A) and found a  
258 diversity of cells. For simple-like cells – cells for which the LNP had a high predictive power – all models

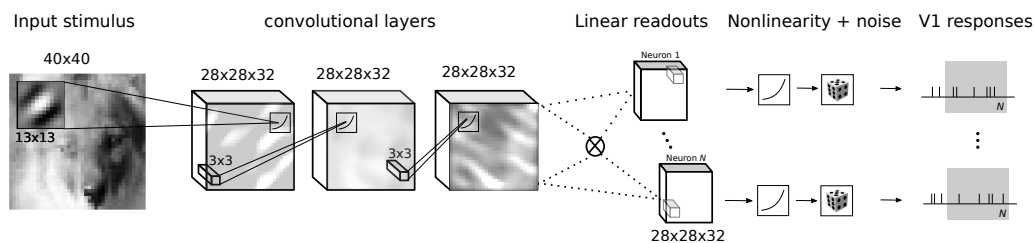

**Figure 5. Convolutional neural network architecture.** Following the approach of Klindt et al. 2017, we trained a three-layer convolutional neural network to produce a feature space fed to a GLM-like model. In contrast to the VGG-based model, both feature space and readout weights are trained only on the neural data.

259 performed approximately equally. However, the nonlinear feature spaces were able to better represent  
260 nonlinear (e.g. complex) cells, for which the BWT had a much larger performance than LNP (Fig. 6A).

261 The two deep learning approaches outperformed the other models of V1 (Fig. 6B, D). The LNP  
262 model achieved 17% *FEV*, the Berkeley Wavelet Transform model 39% *FEV*. The performance of the  
263 VGG-based model was comparable to that of the CNN trained directly on the data (Fig. 6C, D). On  
264 average, the VGG-based model yielded on average a slightly higher performance (50.1% *FEV*) than  
265 the data-driven CNN (46% *FEV*), but this difference was not significant ( $p = 0.09$ , t-test). In addition,  
266 a more extensive search of hyperparameters of the data-driven CNN architecture might lead to better  
267 performance.

## 268 4 Discussion

269 We fit two models based on convolutional neural networks to V1 responses to natural stimuli in awake,  
270 fixating monkeys: a goal-driven model, which uses the representations learned by a CNN trained on  
271 object recognition (VGG), and a data-driven model, which learns both the convolutional and readout  
272 parameters using stimulus-response pairs with multiple neurons simultaneously. Both approaches yielded  
273 comparable performance and outperformed the widely used LNP (Simoncelli et al., 2004) and the wavelet-  
274 decomposition model (BWT; Willmore et al. 2008), which held the previous state of the art in prediction  
275 of V1 responses to natural images. For the goal-driven model, we found that features of intermediate  
276 layers of VGG (layer conv3\_1) explain V1 best.

277 The most successful system identification approaches to date all build on feature spaces shared by all  
278 neurons. There are three main ways in which this feature space can be chosen. First, handcrafted features  
279 have been used, which are based on existing neural encoding theories (e.g. BWT, Willmore et al. 2008; or  
280 HMAX, Riesenhuber and Poggio 1999). Second, more recent studies have learned shared feature spaces by  
281 jointly fitting the stimulus-response of all neurons in the dataset (Antolik et al., 2016; Batty et al., 2016;  
282 Kindel et al., 2017; Klindt et al., 2017; McIntosh et al., 2016). Third, inspired by the success of transfer  
283 learning in the machine learning community, researchers have borrowed representations optimized to solve  
284 a visual task like object recognition and used them to predict responses in high-level areas of the ventral  
285 stream (Yamins et al., 2014). We compared these three approaches quantitatively and showed that the  
286 last two have comparable and the highest predictive performance on our monkey V1 dataset.

287 This result has two important implications that we want to briefly discuss. First, the fact that deep  
288 models substantially outperformed the handcrafted feature spaces (BWT) shows that we still do not fully  
289 understand the computations performed by V1 – or at least that there still does not exist an explicit model

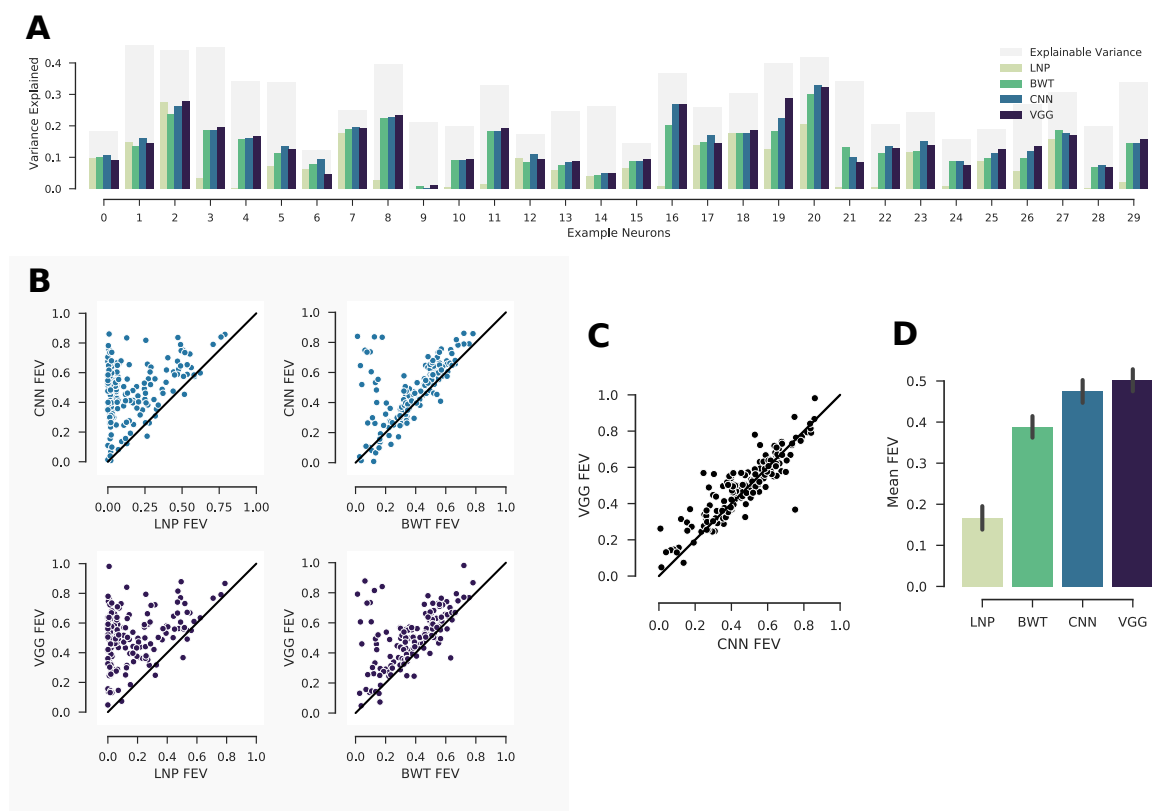

**Figure 6. Deep models are the new state of the art.** **A** Randomly selected cells. The normalized explainable variance (oracle) per cell is shown in gray. For each cell from left to right, the variance explained of: regularized LNP (Simoncelli et al., 2004), BWT (Willmore et al., 2008), three-layer CNN trained on neural responses, and VGG conv3\_1 model (ours). **B** CNN and VGG conv3\_1 models outperform for most cells LNP and BWT. Black line denotes the identity. The performance is given in *FEV* (see Methods). **C**. VGG conv3\_1 features perform slightly better than the three-layer CNN. **D**. Average performance of the four models given in mean fraction of explainable variance explained (*FEV*).

290 applicable to natural images. Second, an architecture optimized for fitting the neural data (CNN model)  
 291 did not outperform a feature space trained on a different task (object recognition). On the one hand, this  
 292 result underscores the power of transfer learning and stresses the relevance of nonlinearities learned by  
 293 VGG for predicting neural responses along the ventral visual stream. On the other hand, the fact that  
 294 the data-driven model reached comparable performance with a shallower and less complex architecture,  
 295 shows that the VGG feature space is not identical to that of V1. If it was, the VGG-based model should  
 296 have outperformed the data-driven approach. Note, though, that these two approaches are each at one  
 297 end of a spectrum: a hybrid approach, where a pre-trained feature space is used as initialization and  
 298 subsequently fine-tuned may provide the right balance of inductive bias and flexibility, perhaps leading to  
 299 even higher performance than either the data-driven or transfer-learning-based approaches. Moreover, it is  
 300 possible that increasing the entropy of the stimulus set or the number of neurons (or both) could improve  
 301 performance of purely data-driven models. We leave these questions for future work.

302 Our work contributes to a growing body of research where goal-driven deep learning models (Yamins  
 303 and DiCarlo, 2016) have shown unprecedented predictive performance of higher areas of the visual stream  
 304 (Cadieu et al., 2014; Yamins et al., 2014), and a hierarchical correspondence between deep networks  
 305 and the ventral stream (Güçlü and van Gerven, 2015; Cichy et al., 2016). Studies based on fMRI have

306 established a correspondence between early layers of CNNs trained on object recognition and V1 (Güçlü  
307 and van Gerven, 2015; Kriegeskorte, 2015), somewhat in contrast to our findings that intermediate layers  
308 performed best. However, these studies are based on fMRI data, which is an average of many neurons'  
309 responses and therefore possibly more linear than individual neurons' responses. Moreover, they used a  
310 shallower and less well performing CNN (AlexNet, Krizhevsky et al. 2012), which has larger, Gabor-shaped  
311 receptive fields in its early layers.

312 Interestingly, the features of multiple VGG layers performed similarly well, with only a shallow peak  
313 at layer conv3\_1 (Fig. 4). This result is to be expected, as it has been observed that in deep neural  
314 networks the features of subsequent convolutional layers are highly redundant. That is, one can predict  
315 the feature maps in any given layer very well by those of a previous layer. More recent state-of-the-art  
316 architectures for object recognition avoid this type of redundancy by enabling 'shortcut' connections that  
317 skip layers. These skip connections encourage each layer to extract 'new' information instead of mainly  
318 carrying along information that has already been extracted. Recent examples for such architectures are  
319 Densely Connected CNNs (Huang et al., 2016), and the residual paths of Residual Networks (He et al.,  
320 2016). Some of these novel architectures hold more similarities with known cortical circuitry. They may  
321 be exploited in the future to extract features for neural system identification in the same way and could  
322 potentially be more interpretable.

323 Although deep models capture nonlinearities that go beyond complex cells, they lack a minimalistic  
324 description that could be meaningfully linked to biology. However, their success over other models makes  
325 them good candidates for an *in-silico* investigation. The advantage of having a good predictive *in-silico*  
326 model is that, unlike a real brain, one can probe it with completely arbitrary stimuli and run unlimited  
327 experiments. Thus, we argue that the chances of finding simple descriptions of the nonlinear computations  
328 performed by the brain are much larger when probing a highly predictive model than when measuring  
329 activity in the brain directly without a predictive model.

## 330 Acknowledgments

331 Research reported in this publication was supported by the German Research Foundation (DFG) grant  
332 EC 479/1-1 to A.S.E; the Bernstein Center for Computational Neuroscience (FKZ 01GQ1002); the  
333 German Excellency Initiative through the Centre for Integrative Neuroscience Tübingen (EXC307); the  
334 National Eye Institute of the National Institutes of Health under Award Numbers R01EY026927 (A.S.T.),  
335 DP1 EY023176 (A.S.T.), and NIH-Pioneer award DP1-OD008301 (A.S.T). The content is solely the  
336 responsibility of the authors and does not necessarily represent the official views of the National Institutes  
337 of Health. This research was also supported by NEI/NIH Core Grant for Vision Research (EY-002520-37),  
338 NEI training grant T32EY00700140 (G.H.D) and F30EY025510 (E.Y.W.). L.A.G was supported by  
339 German National Academic Foundation. This research was also supported by Intelligence Advanced  
340 Research Projects Activity (IARPA) via Department of Interior/Interior Business Center (DoI/IBC)  
341 contract number D16PC00003. The U.S. Government is authorized to reproduce and distribute reprints  
342 for Governmental purposes notwithstanding any copyright annotation thereon. Disclaimer: The views  
343 and conclusions contained herein are those of the authors and should not be interpreted as necessarily  
344 representing the official policies or endorsements, either expressed or implied, of IARPA, DoI/IBC, or the  
345 U.S. Government. The authors have no conflicts of interest to report.

## References

- 346  
347 Adelson EH, Bergen JR (1985) Spatiotemporal energy models for the perception of motion. *JOSA A* 2:284–299.
- 348 Antolík J, Hofer SB, Bednar JA, Mrcic-Flogel TD (2016) Model constrained by visual hierarchy improves prediction  
349 of neural responses to natural scenes. *PLoS Comput Biol* 12:e1004927.
- 350 Batty E, Merel J, Brackbill N, Heitman A, Sher A, Litke A, Chichilnisky E, Paninski L (2016) Multilayer recurrent  
351 network models of primate retinal ganglion cell responses .
- 352 Cadieu CF, Hong H, Yamins DL, Pinto N, Ardila D, Solomon EA, Majaj NJ, DiCarlo JJ (2014) Deep neural networks  
353 rival the representation of primate it cortex for core visual object recognition. *PLoS Comput Biol* 10:e1003963.
- 354 Calabrese A, Paninski L (2011) Kalman filter mixture model for spike sorting of non-stationary data. *Journal of*  
355 *neuroscience methods* 196:159–169.
- 356 Carandini M, Demb JB, Mante V, Tolhurst DJ, Dan Y, Olshausen BA, Gallant JL, Rust NC (2005) Do we know  
357 what the early visual system does? *The Journal of neuroscience* 25:10577–10597.
- 358 Cichy RM, Khosla A, Pantazis D, Torralba A, Oliva A (2016) Comparison of deep neural networks to spatio-  
359 temporal cortical dynamics of human visual object recognition reveals hierarchical correspondence. *Scientific*  
360 *reports* 6.
- 361 Clevert DA, Unterthiner T, Hochreiter S (2015) Fast and accurate deep network learning by exponential linear  
362 units (elus). *arXiv preprint arXiv:1511.07289* .
- 363 Denfield GH, Ecker AS, Shinn TJ, Bethge M, Tolias AS (2017) Attentional fluctuations induce shared variability  
364 in macaque primary visual cortex. *bioRxiv* p. 189282.
- 365 Donahue J, Jia Y, Vinyals O, Hoffman J, Zhang N, Tzeng E, Darrell T (2014) Decaf: A deep convolutional  
366 activation feature for generic visual recognition In *International conference on machine learning*, pp. 647–655.
- 367 Ecker AS, Berens P, Cotton RJ, Subramanian M, Denfield GH, Cadwell CR, Smirnakis SM, Bethge M, Tolias AS  
368 (2014) State dependence of noise correlations in macaque primary visual cortex. *Neuron* 82:235–248.
- 369 Ecker AS, Berens P, Keliris GA, Bethge M, Logothetis NK, Tolias AS (2010) Decorrelated neuronal firing in  
370 cortical microcircuits. *science* 327:584–587.
- 371 Freeman J, Ziemba CM, Heeger DJ, Simoncelli EP, Movshon JA (2013) A functional and perceptual signature of  
372 the second visual area in primates. *Nature neuroscience* 16:974–981.
- 373 Gatys L, Ecker AS, Bethge M (2015) Texture synthesis using convolutional neural networks In *Advances in Neural*  
374 *Information Processing Systems*, pp. 262–270.
- 375 Gatys LA, Ecker AS, Bethge M (2016) Image style transfer using convolutional neural networks In *Proceedings of*  
376 *the IEEE Conference on Computer Vision and Pattern Recognition*, pp. 2414–2423.
- 377 Güçlü U, van Gerven MA (2015) Deep neural networks reveal a gradient in the complexity of neural representations  
378 across the ventral stream. *The Journal of Neuroscience* 35:10005–10014.
- 379 He K, Zhang X, Ren S, Sun J (2016) Deep residual learning for image recognition In *Proceedings of the IEEE*  
380 *conference on computer vision and pattern recognition*, pp. 770–778.
- 381 Heeger DJ (1992) Half-squaring in responses of cat striate cells. *Visual neuroscience* 9:427–443.

- 382 Huang G, Liu Z, Weinberger KQ, van der Maaten L (2016) Densely connected convolutional networks. *arXiv*  
383 *preprint arXiv:1608.06993* .
- 384 Hubel DH, Wiesel TN (1959) Receptive fields of single neurones in the cat's striate cortex. *The Journal of*  
385 *physiology* 148:574–591.
- 386 Hubel DH, Wiesel TN (1968) Receptive fields and functional architecture of monkey striate cortex. *The Journal*  
387 *of physiology* 195:215–243.
- 388 Jones JP, Palmer LA (1987) An evaluation of the two-dimensional gabor filter model of simple receptive fields in  
389 cat striate cortex. *Journal of neurophysiology* 58:1233–1258.
- 390 Kindel WF, Christensen ED, Zylberberg J (2017) Using deep learning to reveal the neural code for images in  
391 primary visual cortex. *arXiv preprint arXiv:1706.06208* .
- 392 Kingma D, Ba J (2014) Adam: A method for stochastic optimization. *arXiv preprint arXiv:1412.6980* .
- 393 Klindt D, Ecker AS, Euler T, Bethge M (2017) Neural system identification for large populations separating “what”  
394 and “where” In *Advances in Neural Information Processing Systems (accepted)*.
- 395 Kriegeskorte N (2015) Deep neural networks: a new framework for modeling biological vision and brain information  
396 processing. *Annual Review of Vision Science* 1:417–446.
- 397 Krizhevsky A, Sutskever I, Hinton GE (2012) Imagenet classification with deep convolutional neural networks In  
398 *Advances in neural information processing systems*, pp. 1097–1105.
- 399 Kümmerer M, Theis L, Bethge M (2014) Deep gaze i: Boosting saliency prediction with feature maps trained on  
400 imagenet. *arXiv preprint arXiv:1411.1045* .
- 401 McIntosh L, Maheswaranathan N, Nayebi A, Ganguli S, Baccus S (2016) Deep learning models of the retinal  
402 response to natural scenes In *Advances in Neural Information Processing Systems*, pp. 1369–1377.
- 403 Olshausen BA, Field DJ (2005) How close are we to understanding v1? *Neural computation* 17:1665–1699.
- 404 Riesenhuber M, Poggio T (1999) Hierarchical models of object recognition in cortex. *Nature neuro-*  
405 *science* 2:1019–1025.
- 406 Russakovsky O, Deng J, Su H, Krause J, Satheesh S, Ma S, Huang Z, Karpathy A, Khosla A, Bernstein M et al.  
407 (2015) Imagenet large scale visual recognition challenge. *International Journal of Computer Vision* 115:211–252.
- 408 Rust NC, Schwartz O, Movshon JA, Simoncelli EP (2005) Spatiotemporal elements of macaque v1 receptive fields.  
409 *Neuron* 46:945–956.
- 410 Shan KQ, Lubenov EV, Siapas AG (2017) Model-based spike sorting with a mixture of drifting t-distributions.  
411 *bioRxiv* p. 109850.
- 412 Simoncelli EP, Paninski L, Pillow J, Schwartz O (2004) Characterization of neural responses with stochastic  
413 stimuli. *The cognitive neurosciences* 3:327–338.
- 414 Simonyan K, Zisserman A (2014) Very deep convolutional networks for large-scale image recognition. *arXiv*  
415 *preprint arXiv:1409.1556* .
- 416 Talebi V, Baker CL (2012) Natural versus synthetic stimuli for estimating receptive field models: a comparison of  
417 predictive robustness. *The Journal of Neuroscience* 32:1560–1576.

- 418 Touryan J, Felsen G, Dan Y (2005) Spatial structure of complex cell receptive fields measured with natural images.  
419 *Neuron* 45:781–791.
- 420 Vintch B, Movshon JA, Simoncelli EP (2015) A convolutional subunit model for neuronal responses in macaque  
421 v1. *The Journal of Neuroscience* 35:14829–14841.
- 422 Willmore B, Prenger RJ, Wu MCK, Gallant JL (2008) The berkeley wavelet transform: a biologically inspired  
423 orthogonal wavelet transform. *Neural computation* 20:1537–1564.
- 424 Willmore BD, Prenger RJ, Gallant JL (2010) Neural representation of natural images in visual area v2. *The*  
425 *Journal of neuroscience* 30:2102–2114.
- 426 Yamins DL, DiCarlo JJ (2016) Using goal-driven deep learning models to understand sensory cortex. *Nature*  
427 *neuroscience* 19:356–365.
- 428 Yamins DL, Hong H, Cadieu CF, Solomon EA, Seibert D, DiCarlo JJ (2014) Performance-optimized hier-  
429 archical models predict neural responses in higher visual cortex. *Proceedings of the National Academy of*  
430 *Sciences* 111:8619–8624.
